# Supplementary material for: Bonding analysis in ytterbium(ii) distannyl and related tetryls
Source: Royal Society of Chemistry journal article supplement (doi:10.1039/d1dt02355a), 2021-01-01
Supplement: d1dt02355a1.pdf [file d1dt02355a1.pdf]

## Electronic Supporting Information

For

### **Bonding analysis in ytterbium(II) distannyl and related tetryls**

Peter M. Chapple,<sup>a</sup> Julien Cartron,<sup>a</sup> Ghanem Hamdoun,<sup>b</sup> Marie Cordier,<sup>a</sup> Samia Kahlal,<sup>a</sup>

Hassan Oulyadi,<sup>c</sup> Jean-François Carpentier,<sup>a</sup> Jean-Yves Saillard\*<sup>a</sup> and Yann Sarazin\*<sup>a</sup>

<sup>a</sup> Univ Rennes, CNRS, ISCR-UMR 6226, 35000 Rennes (France). E-mail : [yann.sarazin@univ-rennes1.fr](mailto:yann.sarazin@univ-rennes1.fr)

<sup>b</sup> Euromed University of Fes (UEMF), Fez, Morocco

<sup>c</sup> Normandie Université, Laboratoire COBRA (UMR 6014 & FR 3038), 76000 Rouen (France).

Corresponding authors: [yann.sarazin@univ-rennes1.fr](mailto:yann.sarazin@univ-rennes1.fr)

[jean-yves.saillard@univ-rennes1.fr](mailto:jean-yves.saillard@univ-rennes1.fr)

## Table of Contents

| <b>Item</b>                                       | <b>Figure</b> | <b>Page</b> |
|---------------------------------------------------|---------------|-------------|
| NMR spectra of novel compounds                    | S1-S7         | 3-7         |
| New NMR spectra for previously reported compounds | S8-S13        | 7-9         |
| X-ray diffraction crystallography details         |               | 10          |
| References                                        |               | 11          |
| Author contributions                              |               | 11          |

## NMR Spectra of Novel Compounds

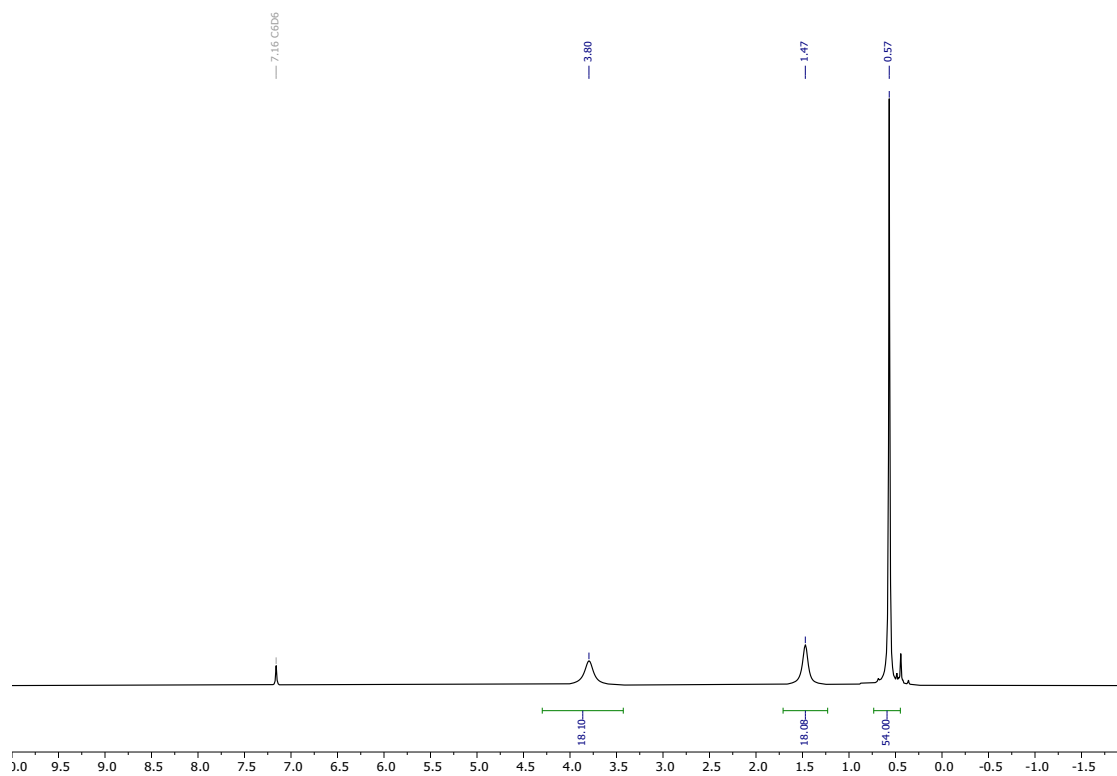

**Figure S1.**  $^1\text{H}$  NMR spectrum (500.13 MHz, benzene- $d_6$ , 300 K) of  $[\text{Yb}\{\text{Sn}(\text{SiMe}_3)_3\}_2 \cdot (\text{thf})_4]$  (**Yb-Sn**).

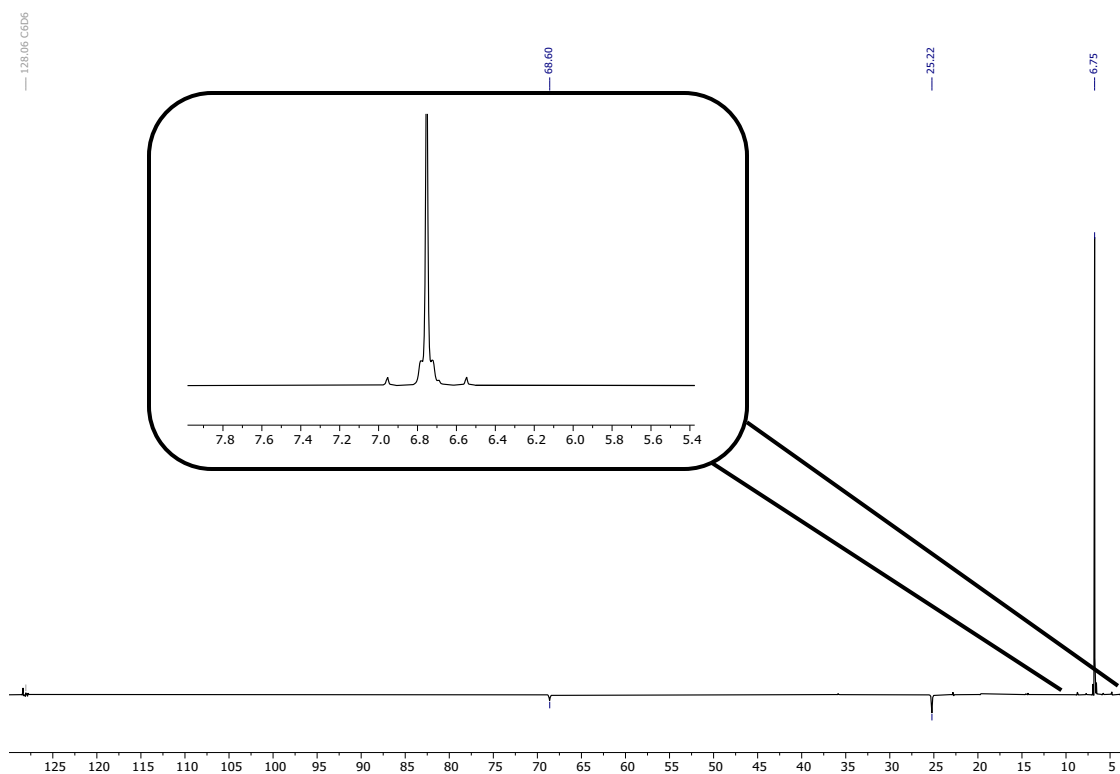

**Figure S2.**  $^{13}\text{C}\{^1\text{H}\}$  DEPT-135 NMR spectrum (500.13 MHz, benzene- $d_6$ , 300 K) of  $[\text{Yb}\{\text{Sn}(\text{SiMe}_3)_3\}_2 \cdot (\text{thf})_4]$  (**Yb-Sn**). Inset shows resonance at 6.75 ppm with observable satellites.

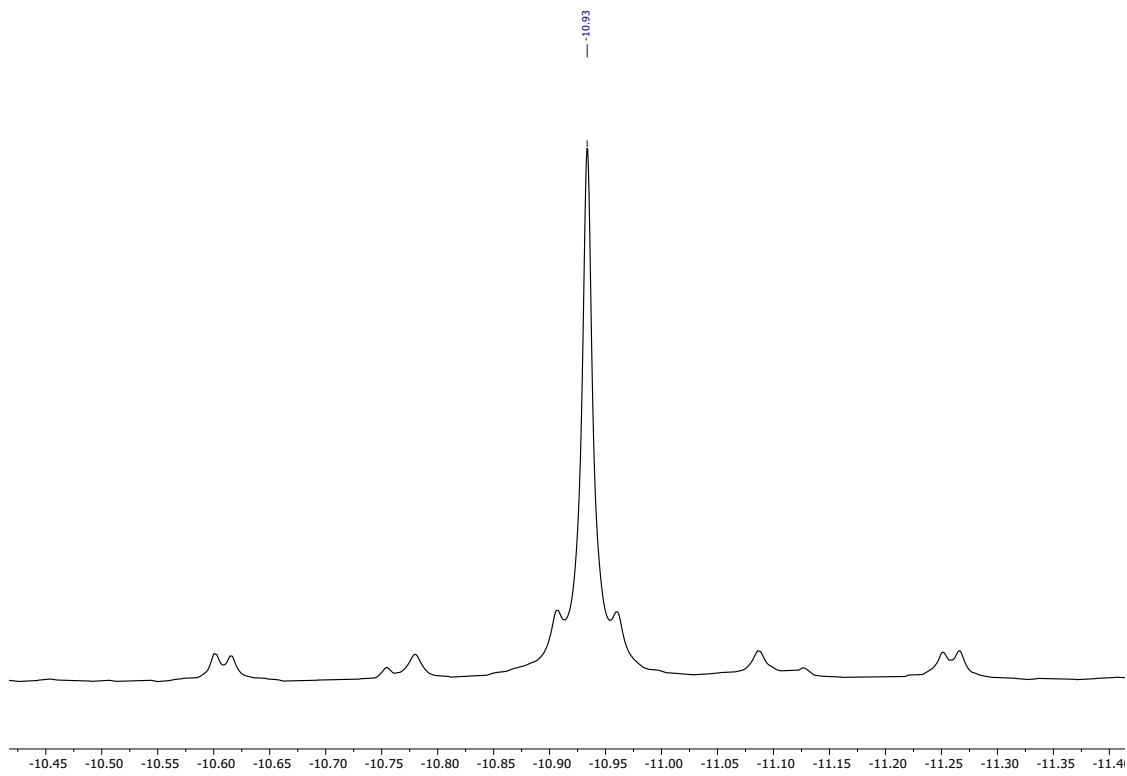

**Figure S3.**  $^{29}\text{Si}\{^1\text{H}\}$  DEPT NMR spectrum (99.36 MHz, benzene- $d_6$ , 300 K) of  $[\text{Yb}\{\text{Sn}(\text{SiMe}_3)_3\}_2 \cdot (\text{thf})_4]$  (**Yb-Sn**).

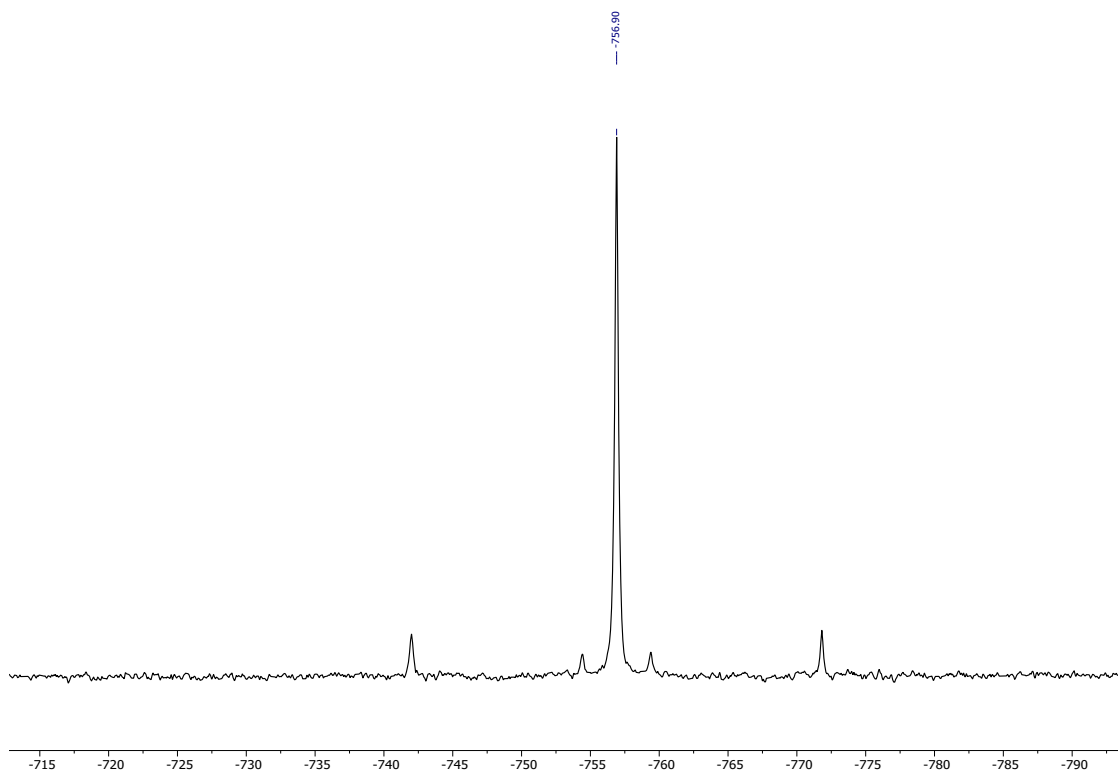

**Figure S4.**  $^{119}\text{Sn}$  NMR spectrum (186.36 MHz, benzene- $d_6$ , 300 K) of  $[\text{Yb}\{\text{Sn}(\text{SiMe}_3)_3\}_2 \cdot (\text{thf})_4]$  (**Yb-Sn**).

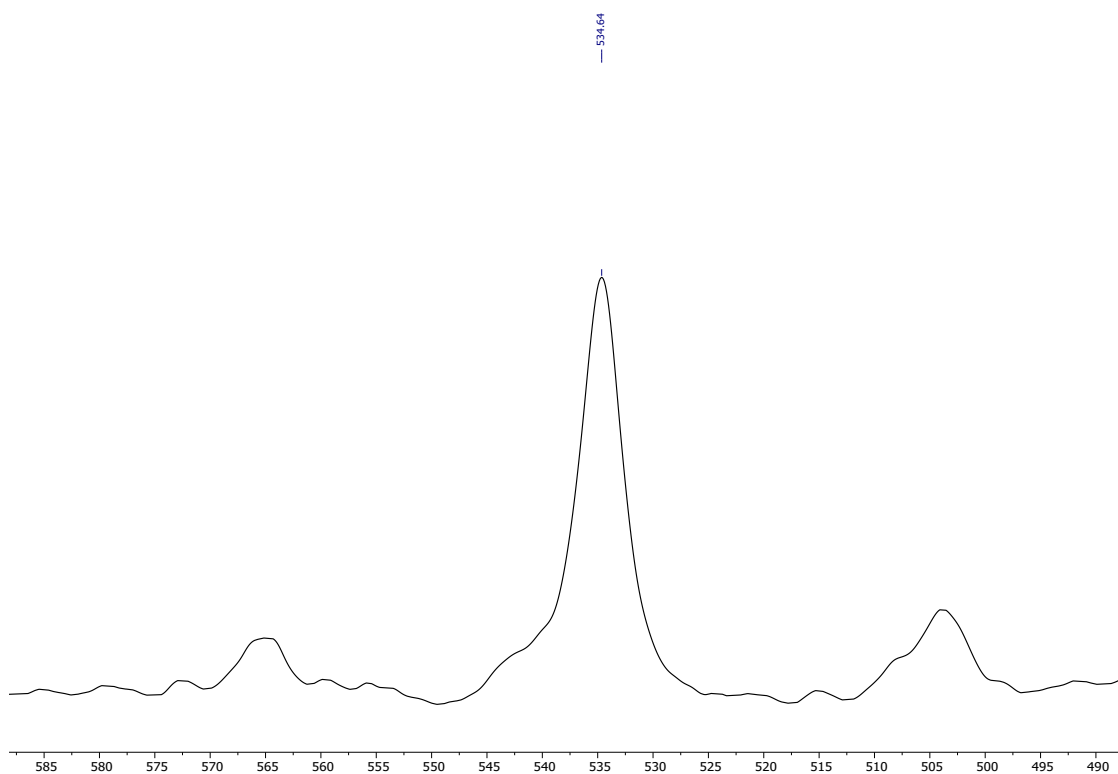

**Figure S5.**  $^{171}\text{Yb}$  NMR spectrum (87.57 MHz, benzene- $d_6$ , 300 K) of  $[\text{Yb}\{\text{Sn}(\text{SiMe}_3)_3\}_2 \cdot (\text{thf})_4]$  (**Yb-Sn**).

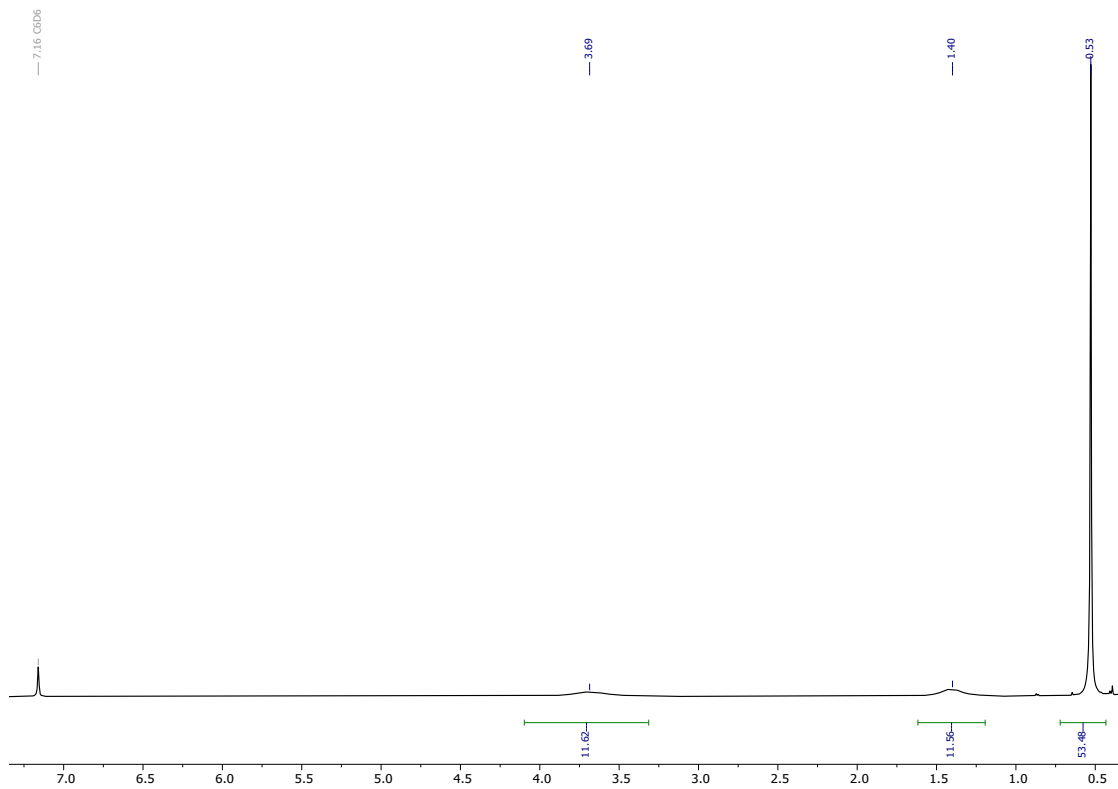

**Figure S6.**  $^1\text{H}$  NMR spectrum (500.13 MHz, benzene- $d_6$ , 298 K) of  $[\text{Yb}\{\text{Ge}(\text{SiMe}_3)_3\}_2 \cdot (\text{thf})_3]$  (**Yb-Ge**).

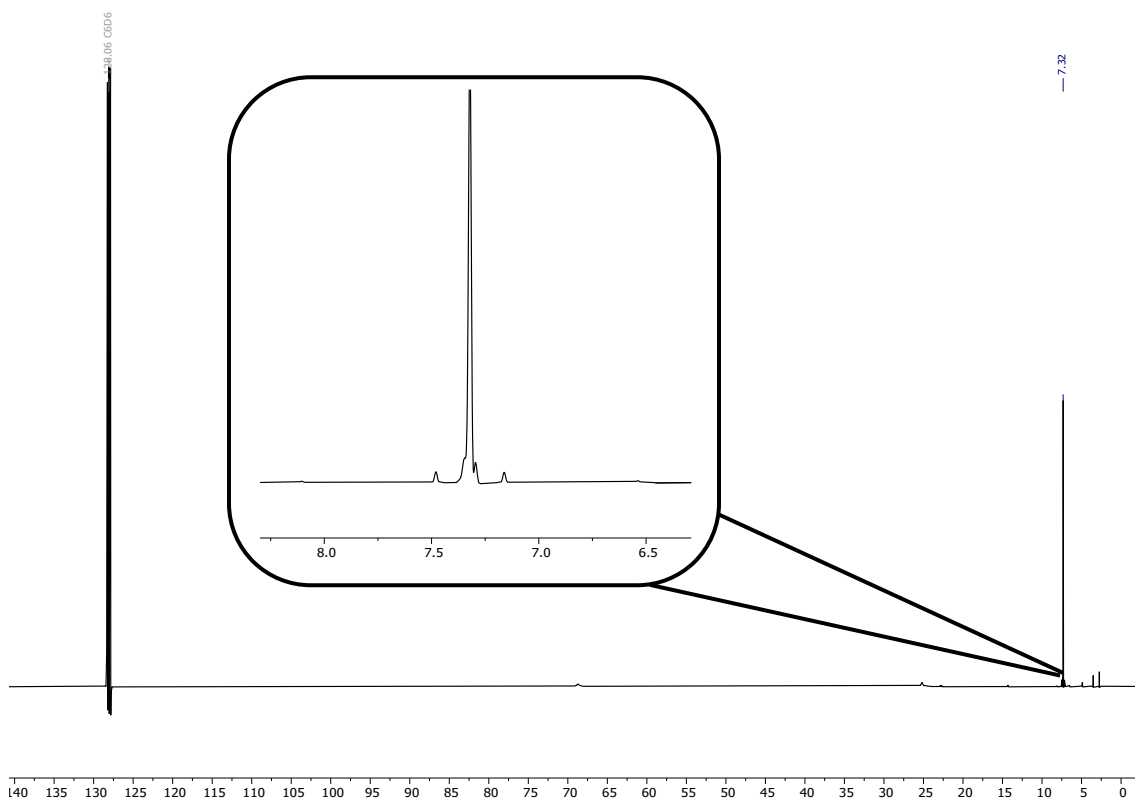

**Figure S7.**  $^{13}\text{C}\{^1\text{H}\}$  NMR spectrum (125.13 MHz, benzene- $d_6$ , 298 K) of  $[\text{Yb}\{\text{Ge}(\text{SiMe}_3)_3\}_2 \cdot (\text{thf})_3]$  (**Yb-Ge**). Inset shows resonance at 7.32 ppm with detectable satellites.

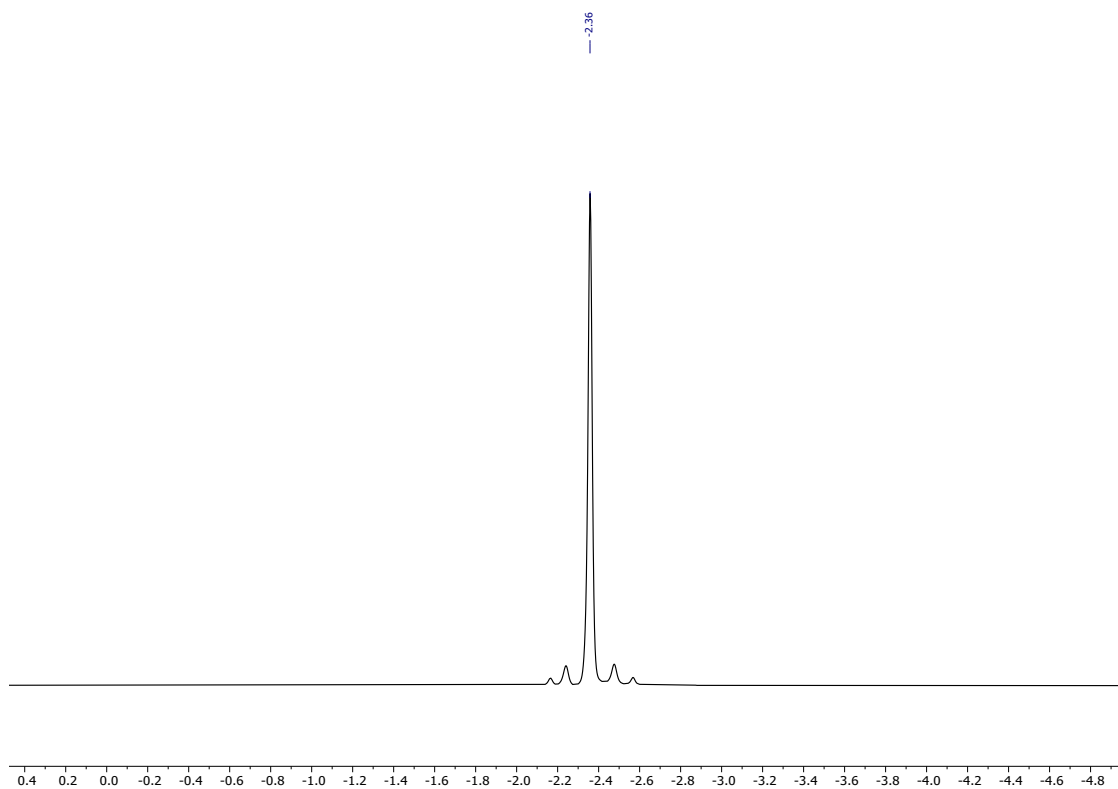

**Figure S8.**  $^{29}\text{Si}\{^1\text{H}\}$  DEPT NMR spectrum (99.36 MHz, benzene- $d_6$ , 298 K) of  $[\text{Yb}\{\text{Ge}(\text{SiMe}_3)_3\}_2 \cdot (\text{thf})_3]$  (**Yb-Ge**).

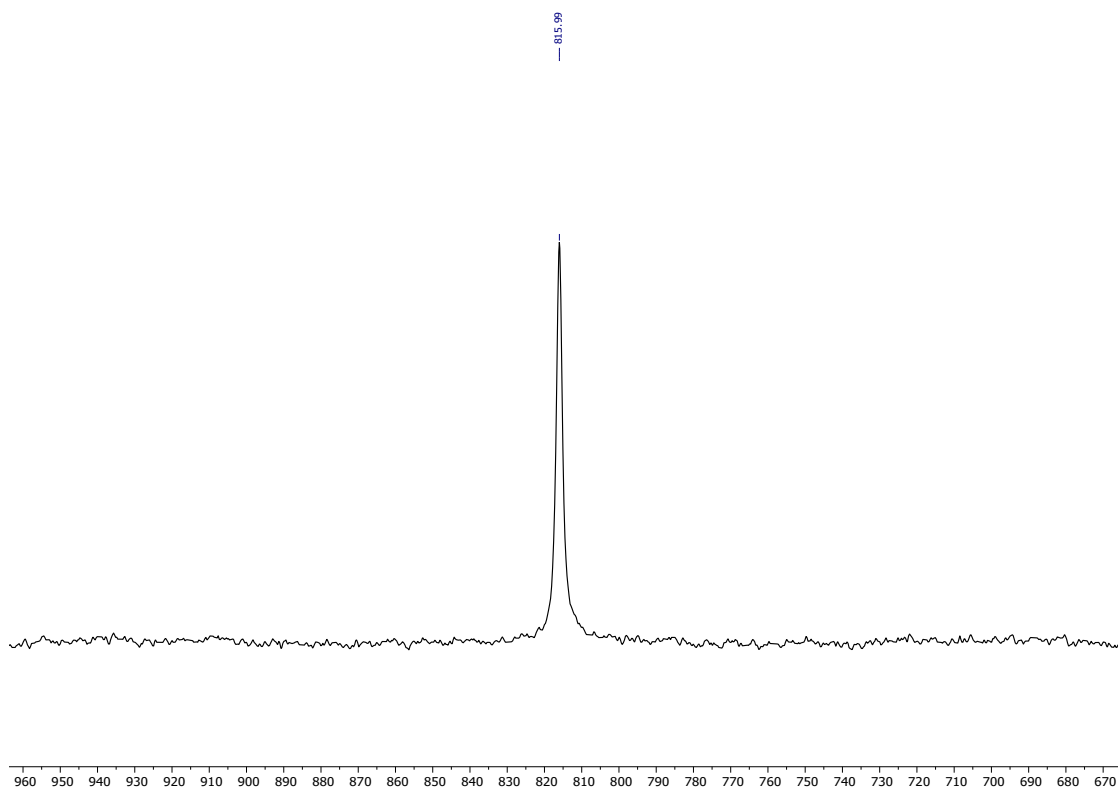

**Figure S9.**  $^{171}\text{Yb}$  NMR spectrum (87.57 MHz, benzene- $d_6$ , 298 K) of  $[\text{Yb}\{\text{Ge}(\text{SiMe}_3)_3\}_2 \cdot (\text{thf})_3]$  (**Yb-Ge**).

## New NMR spectra for previously reported compounds

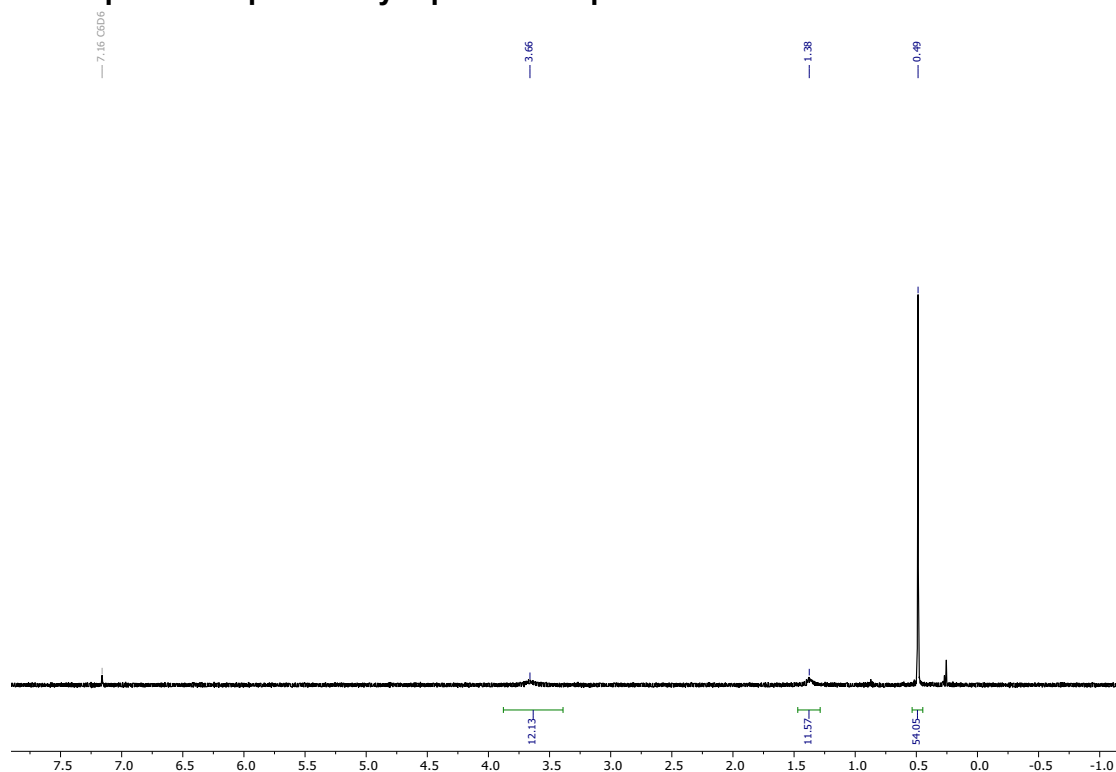

Figure S10.  $^1\text{H}$  NMR spectrum (500.13 MHz, benzene- $d_6$ , 300 K) of  $[\text{Yb}\{\text{Si}(\text{SiMe}_3)_3\}_2 \cdot (\text{thf})_3]$  (**Yb-Si**).

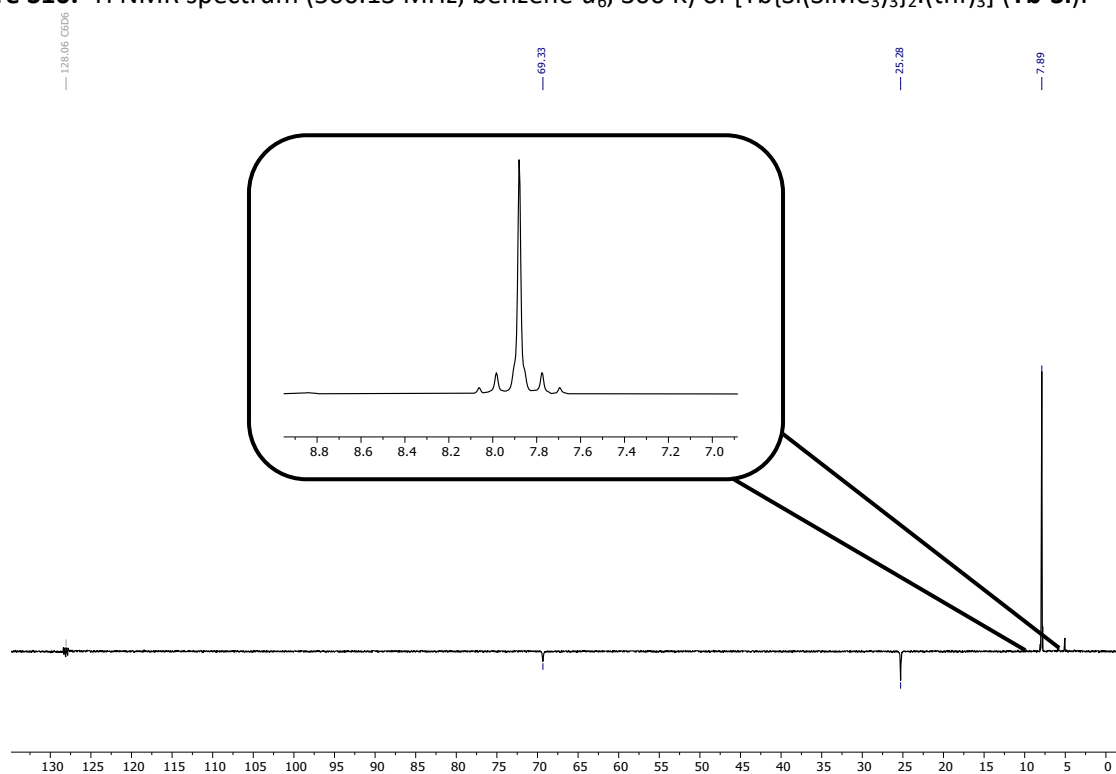

Figure S11.  $^{13}\text{C}\{^1\text{H}\}$  DEPT-135 NMR spectrum (100.65 MHz, benzene- $d_6$ , 300 K) of  $[\text{Yb}\{\text{Si}(\text{SiMe}_3)_3\}_2 \cdot (\text{thf})_3]$  (**Yb-Si**). Inset shows resonance at 7.89 ppm with detectable satellites.



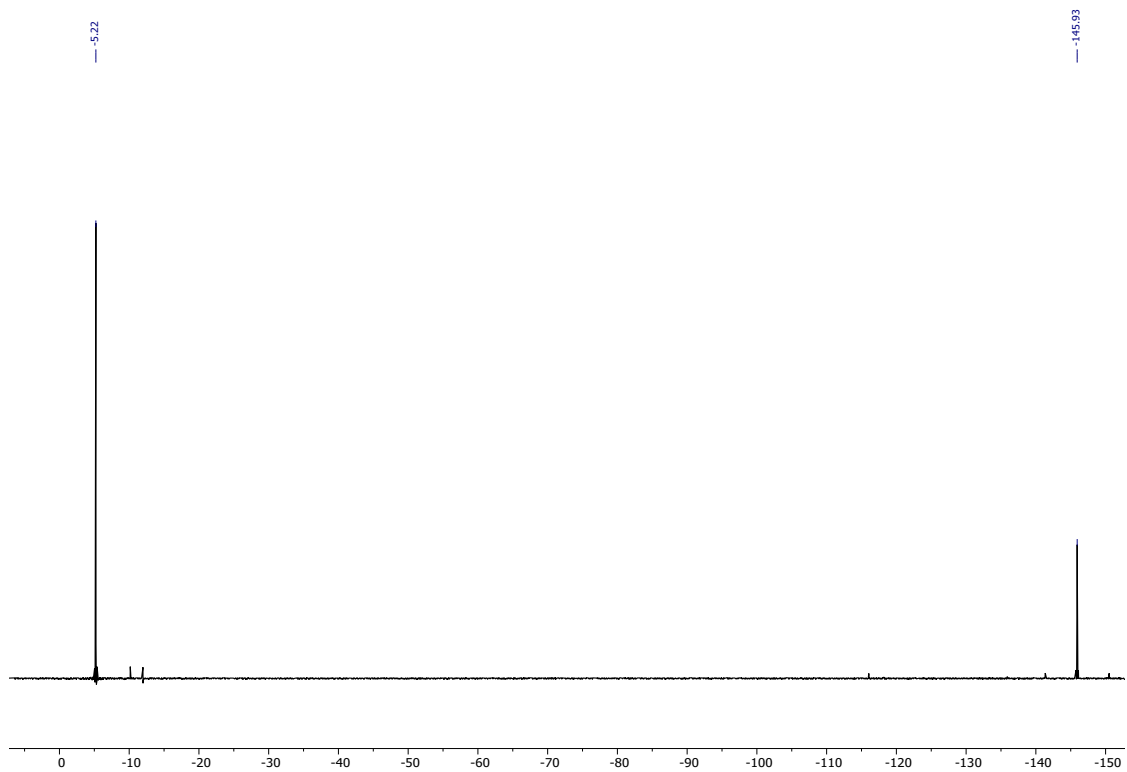

**Figure S12.**  $^{29}\text{Si}\{^1\text{H}\}$  DEPT NMR spectrum (99.36 MHz, benzene- $d_6$ , 300 K) of  $[\text{Yb}\{\text{Si}(\text{SiMe}_3)_2\} \cdot (\text{thf})_3]$  (**Yb-Si**).

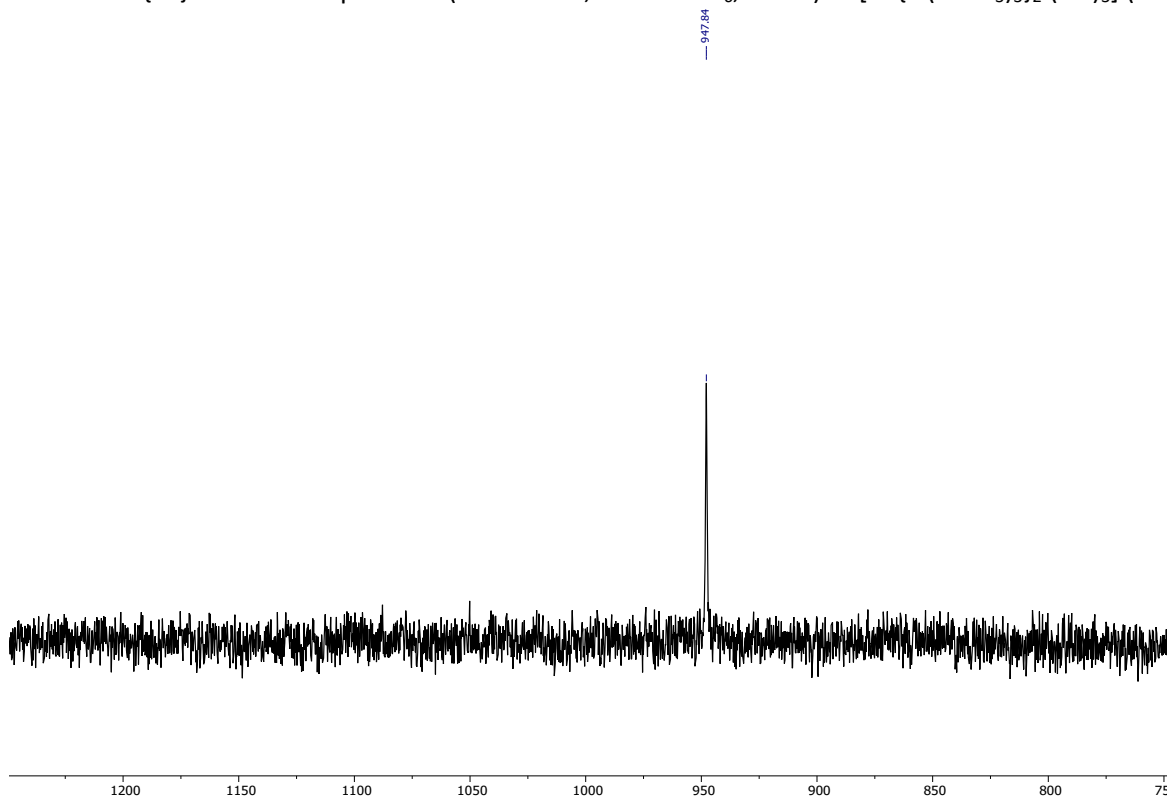

**Figure S13.**  $^{171}\text{Yb}$  NMR spectrum (87.57 MHz, benzene- $d_6$ , 300 K) of  $[\text{Yb}\{\text{Si}(\text{SiMe}_3)_2\} \cdot (\text{thf})_3]$  (**Yb-Si**).

## X-ray diffraction crystallography details

| Compound                                                                     | Complex label | Experiment Number | CCDC Number |
|------------------------------------------------------------------------------|---------------|-------------------|-------------|
| [Yb{Ge(SiMe <sub>3</sub> ) <sub>3</sub> } <sub>2</sub> ·(thf) <sub>3</sub> ] | Yb-Ge         | PC05078           | 2060120     |
| [Yb{Sn(SiMe <sub>3</sub> ) <sub>3</sub> } <sub>2</sub> ·(thf) <sub>4</sub> ] | Yb-Sn         | PC04115           | 2060121     |

### [Yb{Ge(SiMe<sub>3</sub>)<sub>3</sub>}<sub>2</sub>·(thf)<sub>3</sub>] (**Yb-Ge**)

(C<sub>30</sub>H<sub>78</sub>Ge<sub>2</sub>O<sub>3</sub>Si<sub>6</sub>Yb);  $M = 973.68$ . A suitable crystal for X-ray diffraction single crystal experiment (yellow prism, dimensions = 0.400 x 0.310 x 0.290 mm) was selected and mounted on the goniometer head of a D8 VENTURE Bruker AXS diffractometer equipped with a (CMOS) PHOTON 100 detector, using Mo- $K\alpha$  radiation ( $\lambda = 0.71073$  Å, multilayer monochromator) at  $T = 150$  K. The crystal structure has been described in orthorhombic symmetry and  $Pna2_1$  (I.T. #33) space group. Cell parameters have been refined as follows:  $a = 18.943(3)$ ,  $b = 15.0354(17)$ ,  $c = 17.129(2)$  Å,  $V = 4878.6(11)$  Å<sup>3</sup>. Number of formula unit  $Z$  is equal to 4 and calculated density  $d$  and absorption coefficient  $\mu$  values are 1.326 g.cm<sup>-3</sup> and 3.297 mm<sup>-1</sup> respectively. The structure was solved by dual-space algorithm using the *SHELXT* program,<sup>1</sup> and then refined with full-matrix least-squares methods based on  $F^2$  (*SHELXL*).<sup>2</sup> All non-hydrogen atoms were refined with anisotropic atomic displacement parameters. H atoms were finally included in their calculated positions and treated as riding on their parent atom with constrained thermal parameters. A final refinement on  $F^2$  with 11236 unique intensities and 510 parameters converged at  $\omega R_F^2 = 0.0516$  ( $R_F = 0.0265$ ) for 10170 observed reflections with  $I > 2\sigma(I)$ .

### [Yb{Sn(SiMe<sub>3</sub>)<sub>3</sub>}<sub>2</sub>·(thf)<sub>4</sub>] (**Yb-Sn**)

(C<sub>34</sub>H<sub>86</sub>O<sub>4</sub>Si<sub>6</sub>Sn<sub>2</sub>Yb);  $M = 1137.98$ . D8 VENTURE Bruker AXS diffractometer equipped with a (CMOS) PHOTON 100 detector, Mo- $K\alpha$  radiation ( $\lambda = 0.71073$  Å, multilayer monochromator),  $T = 150$  K; orthorhombic  $Pbca$  (I.T.#61),  $a = 13.2657(8)$ ,  $b = 19.8289(11)$ ,  $c = 40.652(2)$  Å,  $V = 10693.3(10)$  Å<sup>3</sup>.  $Z = 8$ ,  $d = 1.414$  g.cm<sup>-3</sup>,  $\mu = 2.825$  mm<sup>-1</sup>. The structure was solved by dual-space algorithm using the *SHELXT* program,<sup>1</sup> and then refined with full-matrix least-squares methods based on  $F^2$  (*SHELXL*).<sup>2</sup> All non-hydrogen atoms were refined with anisotropic atomic displacement parameters. H atoms were finally included in their calculated positions and treated as riding on their parent atom with constrained thermal parameters. A final refinement on  $F^2$  with 12072 unique intensities and 489 parameters converged at  $\omega R_F^2 = 0.0739$  ( $R_F = 0.0378$ ) for 9553 observed reflections with  $I > 2\sigma(I)$ .

## References

- 1 G. M. Sheldrick, *Acta Cryst.*, 2015, **A71**, 3-8.
- 2 G. M. Sheldrick, *Acta Cryst.*, 2015, **C71**, 3-8.

## Author Contributions

Peter. M. Chapple did all synthetic experimental work, analysis of the data and assisted in writing of the draft. Marie Cordier performed the X-ray analysis. Jean-Yves Saillard, Julien Cartron and Samia Kahlal carried out all computational work and took part in the writing of the draft. Jean-François Carpentier participated to the design of experiments and analysis of experimental data. Hassan Oulyadi and Ghanem Hamdoun designed, performed and interpreted the high-resolution NMR analysis. Yann Sarazin was the lead investigator; he participated to the design of experiments, analysis of experimental data and writing of the draft.
